# Supplementary material for: Bone regeneration of minipig mandibular defect by adipose derived mesenchymal stem cells seeded tri-calcium phosphate- poly(D,L-lactide-co-glycolide) scaffolds
Source: PubMed Central journal article supplement (PMC7005305; doi:10.1038/s41598-020-59038-8), 2020-02-06
Supplement: 41598_2020_59038_MOESM1_ESM.pdf [file 41598_2020_59038_MOESM1_ESM.pdf]

**Bone regeneration of minipig mandibular defect by adipose derived mesenchymal stem cells seeded tri-calcium phosphate-poly(D,L-lactide-co-glycolide) scaffolds.**

Florian Andreas Probst<sup>1,2</sup>, Riham Fliefel<sup>1,2,3,\*</sup>, Egon Burian<sup>2,4</sup> Monika Probst<sup>4</sup>, Matthias Eddicks<sup>5</sup>, Matthias Cornelsen<sup>6</sup>, Christina Riedl<sup>2</sup>, Hermann Seitz<sup>6</sup>, Attila Aszódi<sup>2</sup>, Matthias Schieker<sup>2</sup>, and Sven Otto<sup>1,2</sup>

Supplementary Table S1. The entire list of BV/TV of the 13 pigs.

| <b>Identified Number</b> | <b>Pig no</b> | <b>Groups</b> | <b>Bone Volume (BV)</b> | <b>Total Volume (TV)</b> | <b>BV/TV</b> |
|--------------------------|---------------|---------------|-------------------------|--------------------------|--------------|
| 1                        | 495           | Control       | 0.854                   | 3.500                    | <b>0.244</b> |
| 2                        | 500           | Test          | 1.930                   | 5.436                    | <b>0.355</b> |
| 3                        | 504           | Test          | 1.500                   | 4.201                    | <b>0.357</b> |
| 4                        | 498           | Control       | 1.475                   | 4.400                    | <b>0.336</b> |
| 5                        | 489           | Control       | 0.422                   | 5.939                    | <b>0.071</b> |
| 6                        | 496           | Test          | 2.016                   | 5.508                    | <b>0.366</b> |
| 7                        | 503           | Test          | 2.299                   | 7.073                    | <b>0.325</b> |
| 8                        | 490           | Test          | 2.591                   | 8.332                    | <b>0.311</b> |
| 9                        | 507           | Control       | 2.578                   | 8.799                    | <b>0.293</b> |
| 10                       | 485           | Control       | 1.996                   | 7.803                    | <b>0.256</b> |
| 11                       | 492           | Test          | 3.584                   | 8.220                    | <b>0.436</b> |
| 12                       | 497           | Test          | 1.335                   | 4.650                    | <b>0.287</b> |
| 13                       | 499           | Control       | 0.826                   | 5.741                    | <b>0.144</b> |

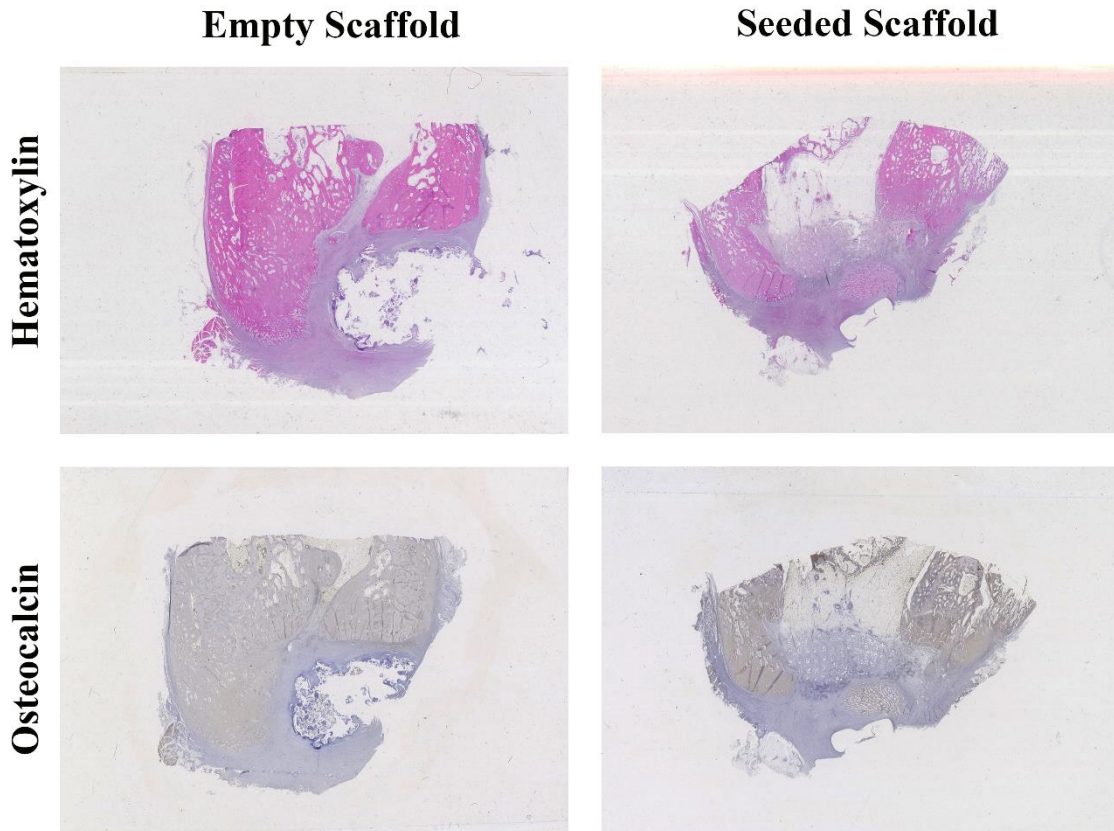

**Supplementary Figure S1. Bone regeneration capacity in the mandibular bone defect of minipigs evaluated by histological analysis and immunohistochemical staining at 12 weeks after implantation. (a)** Haematoxylin and Eosin (H&E)-stained sections of the empty and seeded scaffolds at 12 weeks. **(b)** Immunohistochemical staining for Osteocalcin in the empty and pADSC-seeded scaffolds. Data presented as means  $\pm$  SD (n = 3).
